# Supplementary material for: Relative Validity of the Meal-Based Diet History Questionnaire for Estimating Nutrient Intake among Japanese Women and Men aged 30–76 Years
Source: MDPI journal article supplement (doi:10.3390/nu14204270), 2022-10-13
Supplement: s1 [file s1]

**Table S1.** Mean estimates of crude intakes of nutrients derived from the 4-day weighed dietary record (DR) and those derived from the web version of the Meal-based Diet History Questionnaire (MDHQ) in 111 Japanese women and 111 Japanese men<sup>1</sup>.

|                                     | Unit   | Women         |                | Unit   | Men           |                 |
|-------------------------------------|--------|---------------|----------------|--------|---------------|-----------------|
|                                     |        | DR            | Web MDHQ       |        | DR            | Web MDHQ        |
| Protein                             | g/day  | 64.0 ± 15.3   | 48.9 ± 11.9 c  | g/day  | 79.0 ± 17.5   | 57.9 ± 14.8 c   |
| Fat                                 | g/day  | 60.2 ± 16.1   | 48.5 ± 14.2 c  | g/day  | 72.9 ± 19.3   | 53.1 ± 17.2 c   |
| SFA                                 | g/day  | 18.0 ± 5.2    | 14.9 ± 5.2 c   | g/day  | 20.9 ± 5.9    | 15.7 ± 6.8 c    |
| MUFA                                | g/day  | 22.9 ± 7.1    | 17.6 ± 5.3 c   | g/day  | 28.5 ± 8.4    | 19.8 ± 6.1 c    |
| PUFA                                | g/day  | 12.2 ± 4.1    | 10.7 ± 3.2 c   | g/day  | 14.9 ± 4.8    | 11.8 ± 3.5 c    |
| n-6 PUFA                            | g/day  | 10.1 ± 3.4    | 9.0 ± 2.6 b    | g/day  | 12.2 ± 4.1    | 9.8 ± 2.9 c     |
| n-3 PUFA                            | g/day  | 2.13 ± 0.98   | 1.74 ± 0.62 c  | g/day  | 2.71 ± 1.23   | 1.98 ± 0.66 c   |
| Marine-origin n-3 PUFA <sup>2</sup> | g/day  | 0.66 ± 0.61   | 0.41 ± 0.27 c  | g/day  | 0.87 ± 0.66   | 0.55 ± 0.28 c   |
| EPA                                 | g/day  | 0.21 ± 0.23   | 0.13 ± 0.09 c  | g/day  | 0.28 ± 0.24   | 0.17 ± 0.10 c   |
| n-3 DPA                             | g/day  | 0.07 ± 0.06   | 0.04 ± 0.02 c  | g/day  | 0.09 ± 0.07   | 0.06 ± 0.03 c   |
| DHA                                 | g/day  | 0.38 ± 0.34   | 0.24 ± 0.15 c  | g/day  | 0.50 ± 0.37   | 0.32 ± 0.16 c   |
| α-linolenic acid                    | g/day  | 1.38 ± 0.69   | 1.28 ± 0.42    | g/day  | 1.73 ± 0.96   | 1.36 ± 0.46 c   |
| Cholesterol                         | mg/day | 302 ± 106     | 228 ± 84 c     | mg/day | 378 ± 127     | 257 ± 100 c     |
| Carbohydrate                        | g/day  | 217.2 ± 50.0  | 193.1 ± 52.0 c | g/day  | 282.1 ± 63.0  | 252.9 ± 66.1 c  |
| Added sugars                        | g/day  | 30.3 ± 17.0   | 31.0 ± 19.9    | g/day  | 35.5 ± 27.7   | 33.4 ± 25.2     |
| Soluble dietary fiber               | g/day  | 2.94 ± 1.03   | 2.16 ± 0.68 c  | g/day  | 3.24 ± 1.02   | 2.34 ± 0.85 c   |
| Insoluble dietary fiber             | g/day  | 8.93 ± 3.50   | 6.98 ± 2.11 c  | g/day  | 9.73 ± 3.11   | 7.72 ± 2.42 c   |
| Total dietary fiber                 | g/day  | 12.3 ± 4.5    | 9.8 ± 3.1 c    | g/day  | 13.4 ± 4.1    | 10.7 ± 3.5 c    |
| Alcohol                             | g/day  | 5.67 ± 14.22  | 7.37 ± 16.71   | g/day  | 21.75 ± 32.89 | 25.33 ± 35.31   |
| Water                               | g/day  | 2214 ± 622    | 2329 ± 638     | g/day  | 2683 ± 782    | 2642 ± 929      |
| Retinol                             | μg/day | 188 ± 347     | 133 ± 59       | μg/day | 247 ± 571     | 132 ± 82 a      |
| α-carotene                          | μg/day | 489 ± 460     | 512 ± 360      | μg/day | 515 ± 479     | 573 ± 458       |
| β-carotene                          | μg/day | 2322 ± 1530   | 2266 ± 1265    | μg/day | 2437 ± 1487   | 2265 ± 1378     |
| Cryptoxanthin                       | μg/day | 92.5 ± 185.4  | 124.8 ± 191.4  | μg/day | 66.6 ± 107.0  | 111.9 ± 170.0 a |
| β-carotene equivalent <sup>3</sup>  | μg/day | 2648 ± 1744   | 2620 ± 1427    | μg/day | 2770 ± 1701   | 2644 ± 1600     |
| Retinol equivalent <sup>4</sup>     | μg/day | 409 ± 385     | 353 ± 141      | μg/day | 479 ± 598     | 354 ± 171 a     |
| Vitamin D                           | μg/day | 5.91 ± 4.43   | 4.23 ± 2.27 c  | μg/day | 7.04 ± 4.81   | 5.29 ± 2.39 c   |
| α-tocopherol                        | mg/day | 6.89 ± 2.02   | 5.73 ± 1.90 c  | mg/day | 8.22 ± 2.60   | 6.20 ± 2.03 c   |
| Vitamin K                           | μg/day | 195.2 ± 102.4 | 162.5 ± 74.9 c | μg/day | 208.6 ± 106.3 | 155.7 ± 83.6 c  |
| Thiamin                             | mg/day | 0.86 ± 0.30   | 0.70 ± 0.20 c  | mg/day | 1.05 ± 0.29   | 0.81 ± 0.23 c   |
| Riboflavin                          | mg/day | 1.12 ± 0.32   | 0.95 ± 0.26 c  | mg/day | 1.31 ± 0.37   | 1.03 ± 0.34 c   |
| Niacin                              | mg/day | 16.2 ± 5.1    | 13.3 ± 3.7 c   | mg/day | 20.7 ± 5.8    | 16.7 ± 4.8 c    |
| Vitamin B-6                         | mg/day | 1.13 ± 0.40   | 0.87 ± 0.26 c  | mg/day | 1.38 ± 0.41   | 1.05 ± 0.35 c   |
| Vitamin B-12                        | μg/day | 4.88 ± 3.32   | 3.38 ± 1.84 c  | μg/day | 5.93 ± 3.39   | 4.24 ± 1.88 c   |
| Folate                              | μg/day | 270 ± 100     | 220 ± 72 c     | μg/day | 304 ± 115     | 237 ± 83 c      |
| Pantothenic acid                    | mg/day | 5.18 ± 1.24   | 4.20 ± 1.06 c  | mg/day | 6.20 ± 1.58   | 4.81 ± 1.31 c   |
| Vitamin C                           | mg/day | 79 ± 35       | 68 ± 28 b      | mg/day | 90 ± 39       | 70 ± 32 c       |
| Sodium                              | mg/day | 3340 ± 1018   | 3221 ± 970     | mg/day | 4335 ± 1472   | 3931 ± 1163 a   |
| Potassium                           | mg/day | 2242 ± 656    | 1968 ± 542 c   | mg/day | 2536 ± 686    | 2146 ± 629 c    |
| Calcium                             | mg/day | 477 ± 195     | 415 ± 135 c    | mg/day | 505 ± 210     | 399 ± 178 c     |
| Magnesium                           | mg/day | 244 ± 75      | 219 ± 60 c     | mg/day | 281 ± 85      | 247 ± 73 c      |
| Phosphorus                          | mg/day | 951 ± 241     | 774 ± 198 c    | mg/day | 1127 ± 285    | 883 ± 276 c     |
| Iron                                | mg/day | 6.72 ± 2.17   | 5.41 ± 1.59 c  | mg/day | 7.70 ± 2.07   | 5.96 ± 1.75 c   |
| Zinc                                | mg/day | 7.56 ± 1.90   | 6.10 ± 1.40 c  | mg/day | 9.20 ± 2.14   | 7.23 ± 1.90 c   |
| Copper                              | mg/day | 1.00 ± 0.31   | 0.84 ± 0.23 c  | mg/day | 1.18 ± 0.31   | 0.99 ± 0.26 c   |
| Manganese                           | mg/day | 2.86 ± 0.98   | 2.85 ± 1.13    | mg/day | 3.56 ± 1.28   | 3.42 ± 1.39     |

Abbreviations: SFA, saturated fatty acids; MUFA, monounsaturated fatty acids; PUFA, polyunsaturated fatty acids; EPA, eicosapentaenoic acid; DPA, Docosapentaenoic acid; DHA, Docosahexaenoic acid. <sup>1</sup> Values are means ± standard deviations. The values derived from the MDHQ were compared with those derived from the DR using the paired *t*-test: a, *p* < 0.05; b, *p* < 0.01; c, *p* < 0.001. <sup>2</sup> Sum of EPA, n-3 DPA, and DHA. <sup>3</sup> Sum of β-carotene, α-carotene/2, and cryptoxanthin/2. <sup>4</sup> Sum of retinol, β-carotene/12, α-carotene/24, and cryptoxanthin/24.

**Table S2.** Mean estimates of crude and energy-adjusted intakes of nutrients derived from the paper version of the Meal-based Diet History Questionnaire (MDHQ) in 111 Japanese women<sup>1</sup>.

|                                     | Crude model |                 | Residual model |                 | Density model |                |
|-------------------------------------|-------------|-----------------|----------------|-----------------|---------------|----------------|
|                                     | Unit        | Paper MDHQ      | Unit           | Paper MDHQ      | Unit          | Paper MDHQ     |
| Protein                             | g/day       | 50.8 ± 12.4 c   | g/day          | 50.8 ± 7.4 c    | % of energy   | 13.5 ± 2.0 c   |
| Fat                                 | g/day       | 50.0 ± 14.5 c   | g/day          | 50.0 ± 8.6 c    | % of energy   | 29.7 ± 5.3 b   |
| SFA                                 | g/day       | 15.3 ± 5.1 c    | g/day          | 15.3 ± 3.4 c    | % of energy   | 9.1 ± 2.0      |
| MUFA                                | g/day       | 18.1 ± 5.3 c    | g/day          | 18.1 ± 3.3 c    | % of energy   | 10.8 ± 2.0 c   |
| PUFA                                | g/day       | 11.1 ± 3.3 b    | g/day          | 11.1 ± 2.3 c    | % of energy   | 6.6 ± 1.4      |
| n-6 PUFA                            | g/day       | 9.3 ± 2.7 a     | g/day          | 9.3 ± 1.9 c     | % of energy   | 5.5 ± 1.1 c    |
| n-3 PUFA                            | g/day       | 1.80 ± 0.67 c   | g/day          | 1.80 ± 0.52 c   | % of energy   | 1.06 ± 0.31 c  |
| Marine-origin n-3 PUFA <sup>2</sup> | g/day       | 0.43 ± 0.27 c   | g/day          | 0.43 ± 0.24 c   | % of energy   | 0.25 ± 0.14    |
| EPA                                 | g/day       | 0.13 ± 0.09 c   | g/day          | 0.13 ± 0.08 c   | % of energy   | 0.08 ± 0.05    |
| n-3 DPA                             | g/day       | 0.04 ± 0.02 c   | g/day          | 0.04 ± 0.02 c   | % of energy   | 0.03 ± 0.01    |
| DHA                                 | g/day       | 0.25 ± 0.15 c   | g/day          | 0.25 ± 0.14 c   | % of energy   | 0.15 ± 0.08    |
| α-linolenic acid                    | g/day       | 1.31 ± 0.44     | g/day          | 1.31 ± 0.34     | % of energy   | 0.78 ± 0.20 c  |
| Cholesterol                         | mg/day      | 243 ± 95 c      | mg/day         | 243 ± 70 c      | mg/1000 kcal  | 159 ± 47 b     |
| Carbohydrate                        | g/day       | 198.9 ± 48.5 c  | g/day          | 198.9 ± 28.1 c  | % of energy   | 52.9 ± 7.3 c   |
| Added sugars                        | g/day       | 31.6 ± 18.3     | g/day          | 31.6 ± 15.6     | % of energy   | 8.2 ± 4.1 b    |
| Soluble dietary fiber               | g/day       | 2.31 ± 0.72 c   | g/day          | 2.31 ± 0.49 c   | g/1000 kcal   | 1.52 ± 0.34 c  |
| Insoluble dietary fiber             | g/day       | 7.35 ± 2.26 c   | g/day          | 7.35 ± 1.47 c   | g/1000 kcal   | 4.85 ± 0.98 b  |
| Total dietary fiber                 | g/day       | 10.4 ± 3.3 c    | g/day          | 10.4 ± 2.2 c    | g/1000 kcal   | 6.9 ± 1.5      |
| Alcohol                             | g/day       | 6.80 ± 16.13    | g/day          | 6.80 ± 15.94    | % of energy   | 3.04 ± 6.87 a  |
| Water                               | g/day       | 2405 ± 651 b    | g/day          | 2405 ± 535 b    | g/1000 kcal   | 1616 ± 385 c   |
| Retinol                             | μg/day      | 137 ± 63        | μg/day         | 137 ± 50        | μg/1000 kcal  | 90 ± 33        |
| α-carotene                          | μg/day      | 612 ± 415 b     | μg/day         | 612 ± 394 b     | μg/1000 kcal  | 403 ± 269 c    |
| β-carotene                          | μg/day      | 2484 ± 1399     | μg/day         | 2484 ± 1267     | μg/1000 kcal  | 1633 ± 869 c   |
| Cryptoxanthin                       | μg/day      | 149.9 ± 199.3 b | μg/day         | 149.9 ± 193.4 c | μg/1000 kcal  | 96.1 ± 123.8 c |
| β-carotene equivalent <sup>3</sup>  | μg/day      | 2897 ± 1615     | μg/day         | 2897 ± 1459     | μg/1000 kcal  | 1904 ± 999 c   |
| Retinol equivalent <sup>4</sup>     | μg/day      | 380 ± 166       | μg/day         | 380 ± 135       | μg/1000 kcal  | 250 ± 94       |
| Vitamin D                           | μg/day      | 4.66 ± 2.69 b   | μg/day         | 4.66 ± 2.26 c   | μg/1000 kcal  | 3.03 ± 1.44 a  |
| α-tocopherol                        | mg/day      | 5.95 ± 1.90 c   | mg/day         | 5.95 ± 1.29 c   | mg/1000 kcal  | 3.92 ± 0.90    |
| Vitamin K                           | μg/day      | 169.1 ± 76.5 b  | μg/day         | 169.1 ± 67.5 c  | μg/1000 kcal  | 112.1 ± 45.7   |
| Thiamin                             | mg/day      | 0.73 ± 0.20 c   | mg/day         | 0.73 ± 0.14 c   | mg/1000 kcal  | 0.48 ± 0.09    |
| Riboflavin                          | mg/day      | 1.00 ± 0.30 c   | mg/day         | 1.00 ± 0.21 c   | mg/1000 kcal  | 0.67 ± 0.14    |
| Niacin                              | mg/day      | 13.5 ± 4.0 c    | mg/day         | 13.5 ± 2.9 c    | mg/1000 kcal  | 9.0 ± 1.9 a    |
| Vitamin B-6                         | mg/day      | 0.89 ± 0.29 c   | mg/day         | 0.89 ± 0.20 c   | mg/1000 kcal  | 0.59 ± 0.13 c  |
| Vitamin B-12                        | μg/day      | 3.59 ± 1.95 c   | μg/day         | 3.59 ± 1.70 c   | μg/1000 kcal  | 2.35 ± 1.10 b  |
| Folate                              | μg/day      | 225 ± 78 c      | μg/day         | 225 ± 57 c      | μg/1000 kcal  | 149 ± 41 a     |
| Pantothenic acid                    | mg/day      | 4.37 ± 1.18 c   | mg/day         | 4.37 ± 0.67 c   | mg/1000 kcal  | 2.89 ± 0.45 b  |
| Vitamin C                           | mg/day      | 68 ± 30 b       | mg/day         | 68 ± 24 c       | mg/1000 kcal  | 45 ± 17        |
| Sodium                              | mg/day      | 3380 ± 996      | mg/day         | 3380 ± 683      | mg/1000 kcal  | 2235 ± 439 c   |
| Potassium                           | mg/day      | 2040 ± 613 b    | mg/day         | 2040 ± 411 c    | mg/1000 kcal  | 1350 ± 279     |
| Calcium                             | mg/day      | 446 ± 157       | mg/day         | 446 ± 120 a     | mg/1000 kcal  | 296 ± 82 a     |
| Magnesium                           | mg/day      | 226 ± 67 a      | mg/day         | 226 ± 45 c      | mg/1000 kcal  | 150 ± 31 c     |
| Phosphorus                          | mg/day      | 807 ± 223 c     | mg/day         | 807 ± 136 c     | mg/1000 kcal  | 534 ± 91 a     |
| Iron                                | mg/day      | 5.61 ± 1.77 c   | mg/day         | 5.61 ± 1.13 c   | mg/1000 kcal  | 3.70 ± 0.77 b  |
| Zinc                                | mg/day      | 6.28 ± 1.48 c   | mg/day         | 6.28 ± 0.84 c   | mg/1000 kcal  | 4.18 ± 0.56 b  |
| Copper                              | mg/day      | 0.87 ± 0.24 c   | mg/day         | 0.87 ± 0.14 c   | mg/1000 kcal  | 0.57 ± 0.09    |
| Manganese                           | mg/day      | 2.86 ± 1.19     | mg/day         | 2.86 ± 1.19     | mg/1000 kcal  | 1.92 ± 0.74 c  |

Abbreviations: SFA, saturated fatty acids; MUFA, monounsaturated fatty acids; PUFA, polyunsaturated fatty acids; EPA, eicosapentaenoic acid; DPA, Docosapentaenoic acid; DHA, Docosahexaenoic acid. <sup>1</sup> Values are means ± standard deviations. The values derived from the MDHQ were compared with those derived from the 4-day weighed dietary record (shown in Table S1 for crude estimates and Table 2 for energy-adjusted estimates by the residual model and by the density model) using the paired *t*-test: a, *p* < 0.05; b, *p* < 0.01; c, *p* < 0.001. <sup>2</sup> Sum of EPA, n-3 DPA, and DHA. <sup>3</sup> Sum of β-carotene, α-carotene/2, and cryptoxanthin/2. <sup>4</sup> Sum of retinol, β-carotene/12, α-carotene/24, and cryptoxanthin/24.

**Table S3.** Mean estimates of crude and energy-adjusted intakes of nutrients derived from the paper version of the Meal-based Diet History Questionnaire (MDHQ) in 111 Japanese men<sup>1</sup>.

|                                     | Crude model |                 | Residual model |                 | Density model |               |
|-------------------------------------|-------------|-----------------|----------------|-----------------|---------------|---------------|
|                                     | Unit        | Paper MDHQ      | Unit           | Paper MDHQ      | Unit          | Paper MDHQ    |
| Protein                             | g/day       | 58.5 ± 14.4 c   | g/day          | 58.5 ± 8.1 c    | % of energy   | 12.4 ± 1.8 c  |
| Fat                                 | g/day       | 52.6 ± 14.4 c   | g/day          | 52.6 ± 9.5 c    | % of energy   | 25.1 ± 4.8 c  |
| SFA                                 | g/day       | 15.4 ± 4.8 c    | g/day          | 15.4 ± 3.4 c    | % of energy   | 7.3 ± 1.6 c   |
| MUFA                                | g/day       | 19.6 ± 5.3 c    | g/day          | 19.6 ± 3.6 c    | % of energy   | 9.4 ± 1.9 c   |
| PUFA                                | g/day       | 11.8 ± 3.5 c    | g/day          | 11.8 ± 2.6 c    | % of energy   | 5.6 ± 1.4     |
| n-6 PUFA                            | g/day       | 9.8 ± 2.9 c     | g/day          | 9.8 ± 2.1 c     | % of energy   | 4.7 ± 1.1 c   |
| n-3 PUFA                            | g/day       | 1.96 ± 0.69 c   | g/day          | 1.96 ± 0.54 c   | % of energy   | 0.93 ± 0.28 a |
| Marine-origin n-3 PUFA <sup>2</sup> | g/day       | 0.54 ± 0.30 c   | g/day          | 0.54 ± 0.26 c   | % of energy   | 0.26 ± 0.12   |
| EPA                                 | g/day       | 0.17 ± 0.10 c   | g/day          | 0.17 ± 0.09 c   | % of energy   | 0.08 ± 0.04   |
| n-3 DPA                             | g/day       | 0.06 ± 0.03 c   | g/day          | 0.06 ± 0.02 c   | % of energy   | 0.03 ± 0.01   |
| DHA                                 | g/day       | 0.32 ± 0.17 c   | g/day          | 0.32 ± 0.15 c   | % of energy   | 0.15 ± 0.07   |
| α-linolenic acid                    | g/day       | 1.35 ± 0.46 c   | g/day          | 1.35 ± 0.37 c   | % of energy   | 0.65 ± 0.19 c |
| Cholesterol                         | mg/day      | 273 ± 112 c     | mg/day         | 273 ± 84 c      | mg/1000 kcal  | 142 ± 45 c    |
| Carbohydrate                        | g/day       | 248.5 ± 61.1 c  | g/day          | 248.5 ± 37.9 c  | % of energy   | 52.8 ± 8.2 c  |
| Added sugars                        | g/day       | 31.7 ± 22.5     | g/day          | 31.7 ± 20.8     | % of energy   | 6.6 ± 4.1     |
| Soluble dietary fiber               | g/day       | 2.37 ± 0.83 c   | g/day          | 2.37 ± 0.67 c   | g/1000 kcal   | 1.26 ± 0.38 c |
| Insoluble dietary fiber             | g/day       | 7.82 ± 2.53 c   | g/day          | 7.82 ± 1.96 c   | g/1000 kcal   | 4.14 ± 1.06 a |
| Total dietary fiber                 | g/day       | 10.9 ± 3.7 c    | g/day          | 10.9 ± 2.9 c    | g/1000 kcal   | 5.7 ± 1.6     |
| Alcohol                             | g/day       | 23.77 ± 29.47   | g/day          | 23.77 ± 27.31   | % of energy   | 8.30 ± 9.98 c |
| Water                               | g/day       | 2659 ± 778      | g/day          | 2659 ± 614      | g/1000 kcal   | 1417 ± 324 c  |
| Retinol                             | μg/day      | 132 ± 69 a      | μg/day         | 132 ± 60 a      | μg/1000 kcal  | 69 ± 33       |
| α-carotene                          | μg/day      | 593 ± 469       | μg/day         | 593 ± 439       | μg/1000 kcal  | 307 ± 234 c   |
| β-carotene                          | μg/day      | 2427 ± 1508     | μg/day         | 2427 ± 1382     | μg/1000 kcal  | 1267 ± 747 b  |
| Cryptoxanthin                       | μg/day      | 127.9 ± 155.6 c | μg/day         | 127.9 ± 154.8 c | μg/1000 kcal  | 67.9 ± 85.0 c |
| β-carotene equivalent <sup>3</sup>  | μg/day      | 2821 ± 1743     | μg/day         | 2821 ± 1597     | μg/1000 kcal  | 1472 ± 862 b  |
| Retinol equivalent <sup>4</sup>     | μg/day      | 370 ± 185 a     | μg/day         | 370 ± 161 a     | μg/1000 kcal  | 193 ± 88      |
| Vitamin D                           | μg/day      | 5.22 ± 2.39 c   | μg/day         | 5.22 ± 2.00 c   | μg/1000 kcal  | 2.75 ± 1.09   |
| α-tocopherol                        | mg/day      | 6.19 ± 1.98 c   | mg/day         | 6.19 ± 1.52 c   | mg/1000 kcal  | 3.27 ± 0.84 c |
| Vitamin K                           | μg/day      | 172.0 ± 104.9 c | μg/day         | 172.0 ± 99.7 c  | μg/1000 kcal  | 91.8 ± 64.3   |
| Thiamin                             | mg/day      | 0.82 ± 0.21 c   | mg/day         | 0.82 ± 0.16 c   | mg/1000 kcal  | 0.44 ± 0.09 a |
| Riboflavin                          | mg/day      | 1.06 ± 0.33 c   | mg/day         | 1.06 ± 0.25 c   | mg/1000 kcal  | 0.56 ± 0.14   |
| Niacin                              | mg/day      | 16.8 ± 5.0 c    | mg/day         | 16.8 ± 3.6 c    | mg/1000 kcal  | 8.9 ± 2.1     |
| Vitamin B-6                         | mg/day      | 1.05 ± 0.33 c   | mg/day         | 1.05 ± 0.23 c   | mg/1000 kcal  | 0.55 ± 0.13 c |
| Vitamin B-12                        | μg/day      | 4.33 ± 2.26 c   | μg/day         | 4.33 ± 1.88 c   | μg/1000 kcal  | 2.25 ± 0.96 a |
| Folate                              | μg/day      | 245 ± 89 c      | μg/day         | 245 ± 76 c      | μg/1000 kcal  | 130 ± 43      |
| Pantothenic acid                    | mg/day      | 4.88 ± 1.37 c   | mg/day         | 4.88 ± 0.87 c   | mg/1000 kcal  | 2.58 ± 0.50 c |
| Vitamin C                           | mg/day      | 72 ± 33 c       | mg/day         | 72 ± 30 c       | mg/1000 kcal  | 38 ± 17       |
| Sodium                              | mg/day      | 3973 ± 1143 b   | mg/day         | 3973 ± 849 c    | mg/1000 kcal  | 2106 ± 456 c  |
| Potassium                           | mg/day      | 2197 ± 681 c    | mg/day         | 2197 ± 495 c    | mg/1000 kcal  | 1161 ± 276 a  |
| Calcium                             | mg/day      | 414 ± 157 c     | mg/day         | 414 ± 119 c     | mg/1000 kcal  | 217 ± 63      |
| Magnesium                           | mg/day      | 252 ± 76 c      | mg/day         | 252 ± 51 c      | mg/1000 kcal  | 133 ± 28 c    |
| Phosphorus                          | mg/day      | 894 ± 251 c     | mg/day         | 894 ± 147 c     | mg/1000 kcal  | 471 ± 80 b    |
| Iron                                | mg/day      | 6.15 ± 1.89 c   | mg/day         | 6.15 ± 1.38 c   | mg/1000 kcal  | 3.25 ± 0.82 a |
| Zinc                                | mg/day      | 7.39 ± 1.81 c   | mg/day         | 7.39 ± 1.10 c   | mg/1000 kcal  | 3.92 ± 0.60 a |
| Copper                              | mg/day      | 1.00 ± 0.27 c   | mg/day         | 1.00 ± 0.17 c   | mg/1000 kcal  | 0.53 ± 0.10   |
| Manganese                           | mg/day      | 3.44 ± 1.20     | mg/day         | 3.44 ± 1.20     | mg/1000 kcal  | 1.85 ± 0.65 c |

Abbreviations: SFA, saturated fatty acids; MUFA, monounsaturated fatty acids; PUFA, polyunsaturated fatty acids; EPA, eicosapentaenoic acid; DPA, Docosapentaenoic acid; DHA, Docosahexaenoic acid. <sup>1</sup> Values are means ± standard deviations. The values derived from the MDHQ were compared with those derived from the 4-day weighed dietary record (shown in Table S1 for crude estimates and Table 2 for energy-adjusted estimates by the residual model and by the density model) using the paired *t*-test: a, *p* < 0.05; b, *p* < 0.01; c, *p* < 0.001. <sup>2</sup> Sum of EPA, n-3 DPA, and DHA. <sup>3</sup> Sum of β-carotene, α-carotene/2, and cryptoxanthin/2. <sup>4</sup> Sum of retinol, β-carotene/12, α-carotene/24, and cryptoxanthin/24.

**Table S4.** Pearson correlation coefficients between crude and energy-adjusted estimates of daily intakes of nutrients derived from the 4-day weighed dietary record and those derived from the paper version of the Meal-based Diet History Questionnaire in 111 Japanese women and 111 Japanese men<sup>1</sup>.

|                                           | Women       |                |               | Men         |                |               |
|-------------------------------------------|-------------|----------------|---------------|-------------|----------------|---------------|
|                                           | Crude model | Residual model | Density model | Crude model | Residual model | Density model |
| Protein                                   | 0.40 c      | 0.59 c         | 0.56 c        | 0.46 c      | 0.45 c         | 0.48 c        |
| Fat                                       | 0.31 c      | 0.51 c         | 0.42 c        | 0.23 a      | 0.40 c         | 0.45 c        |
| SFA                                       | 0.29 b      | 0.43 c         | 0.40 c        | 0.24 a      | 0.49 c         | 0.50 c        |
| MUFA                                      | 0.29 b      | 0.44 c         | 0.35 c        | 0.18        | 0.29 b         | 0.35 c        |
| PUFA                                      | 0.38 c      | 0.50 c         | 0.42 c        | 0.32 c      | 0.37 c         | 0.41 c        |
| n-6 PUFA                                  | 0.38 c      | 0.48 c         | 0.41 c        | 0.31 b      | 0.36 c         | 0.41 c        |
| n-3 PUFA                                  | 0.33 c      | 0.42 c         | 0.34 c        | 0.29 b      | 0.28 b         | 0.19 a        |
| Marine-origin n-3 PUFA <sup>2</sup>       | 0.55 c      | 0.61 c         | 0.55 c        | 0.41 c      | 0.35 c         | 0.28 b        |
| EPA                                       | 0.55 c      | 0.61 c         | 0.56 c        | 0.40 c      | 0.36 c         | 0.29 b        |
| n-3 DPA                                   | 0.49 c      | 0.54 c         | 0.45 c        | 0.36 c      | 0.32 c         | 0.28 b        |
| DHA                                       | 0.55 c      | 0.61 c         | 0.54 c        | 0.42 c      | 0.34 c         | 0.26 b        |
| $\alpha$ -linolenic acid                  | 0.05        | 0.03           | 0.01          | 0.09        | 0.13           | 0.10          |
| Cholesterol                               | 0.46 c      | 0.46 c         | 0.38 c        | 0.56 c      | 0.49 c         | 0.46 c        |
| Carbohydrate                              | 0.53 c      | 0.70 c         | 0.65 c        | 0.47 c      | 0.71 c         | 0.76 c        |
| Added sugars                              | 0.32 c      | 0.38 c         | 0.41 c        | 0.20 a      | 0.33 c         | 0.41 c        |
| Soluble dietary fiber                     | 0.45 c      | 0.58 c         | 0.58 c        | 0.42 c      | 0.51 c         | 0.56 c        |
| Insoluble dietary fiber                   | 0.40 c      | 0.55 c         | 0.60 c        | 0.54 c      | 0.65 c         | 0.67 c        |
| Total dietary fiber                       | 0.44 c      | 0.62 c         | 0.65 c        | 0.54 c      | 0.67 c         | 0.68 c        |
| Alcohol                                   | 0.76 c      | 0.77 c         | 0.83 c        | 0.86 c      | 0.75 c         | 0.87 c        |
| Water                                     | 0.31 c      | 0.21 a         | 0.21 a        | 0.39 c      | 0.29 b         | 0.29 b        |
| Retinol                                   | 0.20 a      | 0.15           | 0.15          | 0.35 c      | 0.37 c         | 0.27 b        |
| $\alpha$ -carotene                        | 0.50 c      | 0.56 c         | 0.57 c        | 0.42 c      | 0.40 c         | 0.44 c        |
| $\beta$ -carotene                         | 0.47 c      | 0.57 c         | 0.57 c        | 0.42 c      | 0.42 c         | 0.45 c        |
| Cryptoxanthin                             | 0.56 c      | 0.56 c         | 0.51 c        | 0.41 c      | 0.41 c         | 0.35 c        |
| $\beta$ -carotene equivalent <sup>3</sup> | 0.48 c      | 0.59 c         | 0.59 c        | 0.41 c      | 0.41 c         | 0.44 c        |
| Retinol equivalent <sup>4</sup>           | 0.26 b      | 0.25 b         | 0.26 b        | 0.26 b      | 0.25 b         | 0.20 a        |
| Vitamin D                                 | 0.42 c      | 0.47 c         | 0.42 c        | 0.36 c      | 0.29 b         | 0.25 b        |
| $\alpha$ -tocopherol                      | 0.42 c      | 0.50 c         | 0.45 c        | 0.31 b      | 0.41 c         | 0.44 c        |
| Vitamin K                                 | 0.53 c      | 0.59 c         | 0.57 c        | 0.44 c      | 0.47 c         | 0.52 c        |
| Thiamin                                   | 0.35 c      | 0.42 c         | 0.46 c        | 0.23 a      | 0.31 b         | 0.38 c        |
| Riboflavin                                | 0.47 c      | 0.52 c         | 0.50 c        | 0.53 c      | 0.60 c         | 0.65 c        |
| Niacin                                    | 0.37 c      | 0.43 c         | 0.43 c        | 0.45 c      | 0.28 b         | 0.31 c        |
| Vitamin B-6                               | 0.45 c      | 0.58 c         | 0.61 c        | 0.57 c      | 0.48 c         | 0.52 c        |
| Vitamin B-12                              | 0.51 c      | 0.50 c         | 0.42 c        | 0.45 c      | 0.33 c         | 0.26 b        |
| Folate                                    | 0.49 c      | 0.57 c         | 0.57 c        | 0.45 c      | 0.46 c         | 0.49 c        |
| Pantothenic acid                          | 0.48 c      | 0.56 c         | 0.54 c        | 0.59 c      | 0.63 c         | 0.64 c        |
| Vitamin C                                 | 0.41 c      | 0.46 c         | 0.50 c        | 0.43 c      | 0.50 c         | 0.54 c        |
| Sodium                                    | 0.47 c      | 0.61 c         | 0.55 c        | 0.44 c      | 0.43 c         | 0.43 c        |
| Potassium                                 | 0.48 c      | 0.63 c         | 0.64 c        | 0.51 c      | 0.62 c         | 0.68 c        |
| Calcium                                   | 0.5 c       | 0.59 c         | 0.59 c        | 0.41 c      | 0.48 c         | 0.50 c        |
| Magnesium                                 | 0.45 c      | 0.66 c         | 0.66 c        | 0.51 c      | 0.59 c         | 0.63 c        |
| Phosphorus                                | 0.43 c      | 0.60 c         | 0.59 c        | 0.45 c      | 0.51 c         | 0.54 c        |
| Iron                                      | 0.49 c      | 0.64 c         | 0.61 c        | 0.53 c      | 0.59 c         | 0.63 c        |
| Zinc                                      | 0.42 c      | 0.55 c         | 0.48 c        | 0.48 c      | 0.56 c         | 0.57 c        |
| Copper                                    | 0.44 c      | 0.61 c         | 0.63 c        | 0.53 c      | 0.62 c         | 0.61 c        |
| Manganese                                 | 0.65 c      | 0.63 c         | 0.64 c        | 0.56 c      | 0.59 c         | 0.69 c        |

Abbreviations: SFA, saturated fatty acids; MUFA, monounsaturated fatty acids; PUFA, polyunsaturated fatty acids; EPA, eicosapentaenoic acid; DPA, Docosapentaenoic acid; DHA, Docosahexaenoic acid. <sup>1</sup> Values are expressed as Pearson correlation coefficients: a,  $p < 0.05$ ; b,  $p < 0.01$ ; c,  $p < 0.001$ . <sup>2</sup> Sum of EPA, n-3 DPA, and DHA. <sup>3</sup> Sum of  $\beta$ -carotene,  $\alpha$ -carotene/2, and cryptoxanthin/2. <sup>4</sup> Sum of retinol,  $\beta$ -carotene/12,  $\alpha$ -carotene/24, and cryptoxanthin/24.

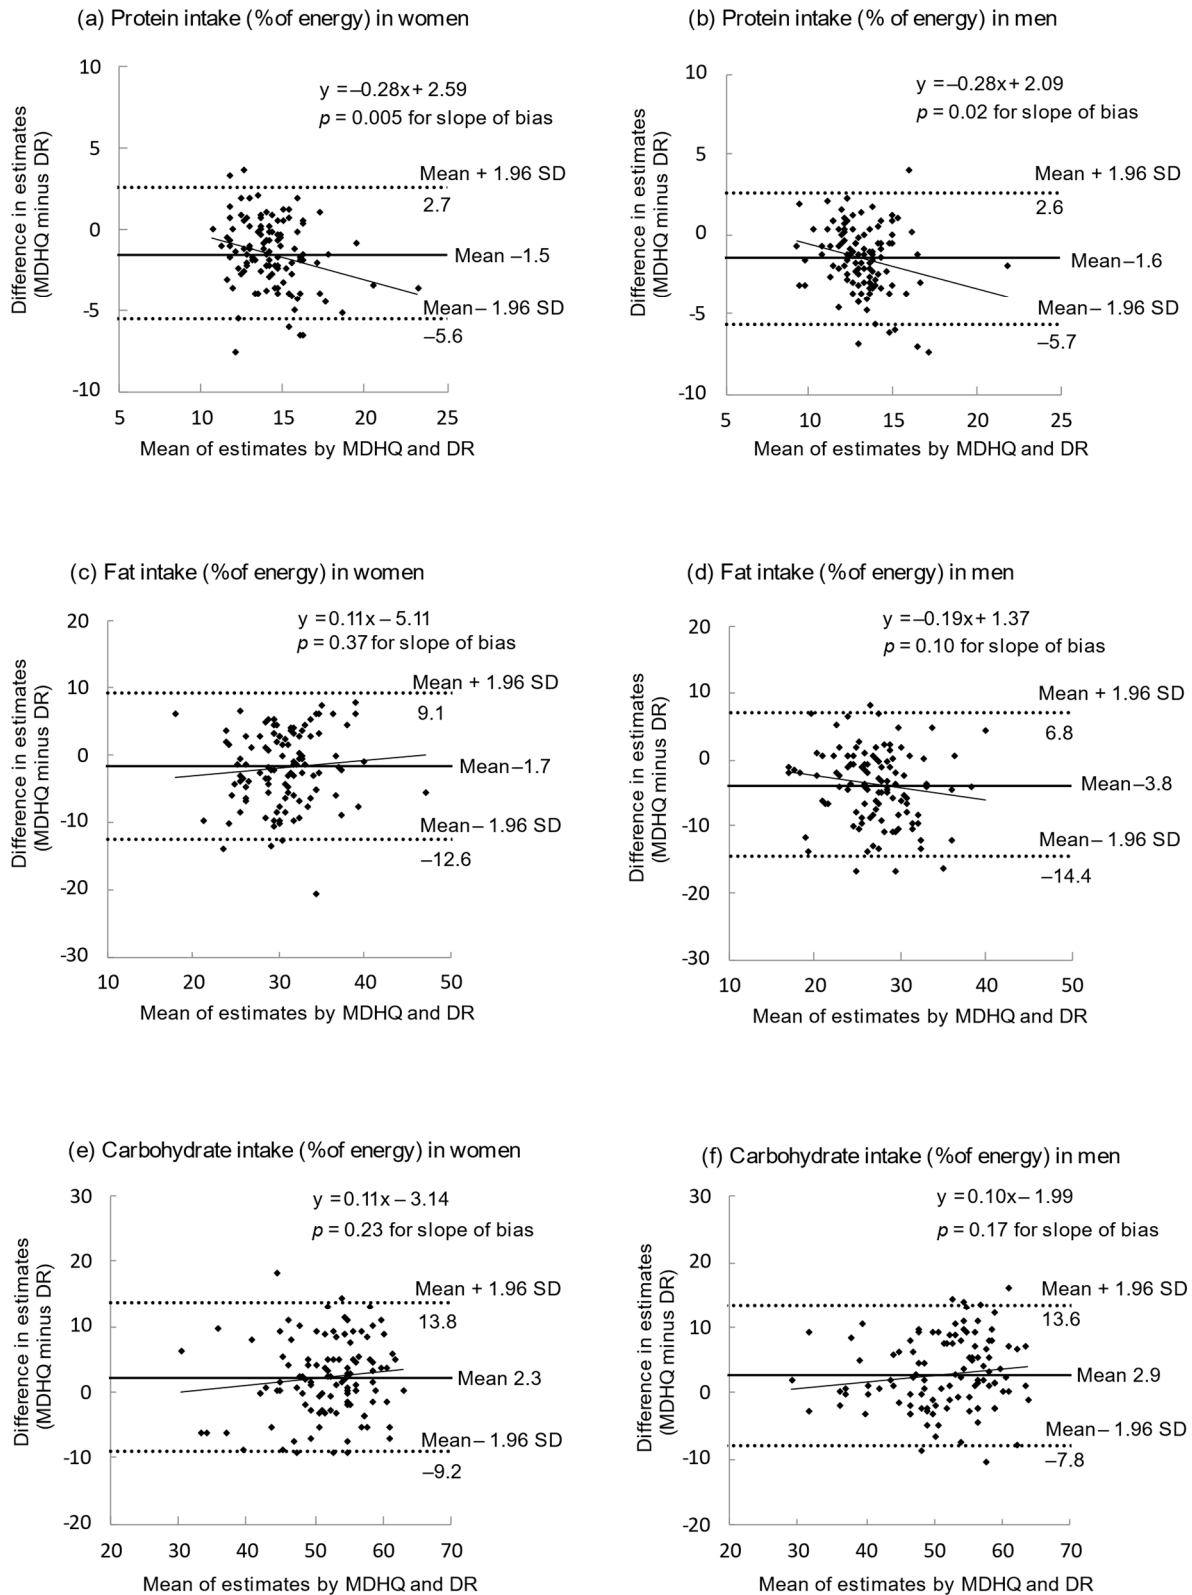

**Figure S1.** Bland–Altman plots assessing the agreement between estimates of energy-adjusted intakes of protein (a, b), fat (c, d), and carbohydrate (e, f) derived from the 4-day weighed dietary record (DR) and those derived from the paper version of the Meal-based Diet History Questionnaire (MDHQ) in 111 Japanese women and 111 Japanese men. Energy adjustment was done using the density model. SD, standard deviation.
